# Supplementary material for: Importin α phosphorylation promotes TPX2 activation by GM130 to control astral microtubules and spindle orientation
Source: Oxford University Press journal article supplement (doi:10.1242/jcs.258356), 2021-02-01
Supplement: jcs258356supp.pdf [file jcs258356supp.pdf]

**A**

| Residues | Peptide sequence                   | Modifications        | # of PSMs |
|----------|------------------------------------|----------------------|-----------|
| 52-68    | NVSSFPDDATSPLQENR                  | 1x phospho [S/T]     | 99        |
| 51-68    | RNVSSFPDDATSPLQENR                 | 1x phospho [S/T]     | 53        |
| 52-83    | NVSSFPDDATSPLQENRRNNQGTVNWSVDDIVK  | 1x phospho [S/T]     | 9         |
| 52-68    | NVSSFPDDATSPLQENR                  | 2x phospho [S55;S62] | 7         |
| 51-83    | RNVSSFPDDATSPLQENRRNNQGTVNWSVDDIVK | 1x phospho [S62]     | 2         |
| 354-366  | EATWTMSNITAGR                      | 1x phospho [T358]    | 1         |
| 487-494  | ASLSLIEK                           | 1x phospho [S490]    | 1         |
| 1-13     | MSTNENANTPAAR                      | 1x oxidation [M1]    | 3         |

**B**

```

KPNA2 (impa1)...NVSSFPDDAT---SPLQENRRNQ
KPNA1 (impa5)...NVATAEEETEEEVMSDGGFHEAQIS
KPNA3 (impa4)...NVPQEESLED---SDVDADFKAQN
KPNA4 (impa3)...NVPHEDICED---SDIDGDIRVQN
KPNA5 (impa6)...NVYLPRNDESMLSPIQDPDISST
KPNA6 (impa7)...NVELINEEAAMFD-SLLMDSYVSST
KPNA7 (impa8)...NITSFCPDTF---SEKTAKGVAVS
    
```

**Fig. S1. Mitotically phosphorylated peptides of importin  $\alpha$  identified by mass spec.**

(A) Sequences of the mitosis-specific phosphorylated peptides of importin  $\alpha$ 1 identified by mass spectrometry and the number of identified peptides (# PSMs).

(B) The CDK1 phosphorylation consensus motif at Ser62 in importin  $\alpha$ 1 (KPNA2) is poorly conserved between members of the importin  $\alpha$  protein family. Alignment of the sequences corresponding to the phosphorylated importin  $\alpha$ 1 peptide of the seven human protein members of the importin  $\alpha$  (karyopherin  $\alpha$ /KPNA) protein family. The serine/proline CDK1 consensus motif of KPNA2 (importin  $\alpha$ 1) highlighted in red, is present in KPNA5 (importin  $\alpha$ 6) but not in other family members.
